# Supplementary material
Source: PubMed Central journal article supplement (PMC4051135)
Supplement: supp_pcu039_pcp-2013-e-00559-File006.pdf [file supp_pcu039_pcp-2013-e-00559-File006.pdf]

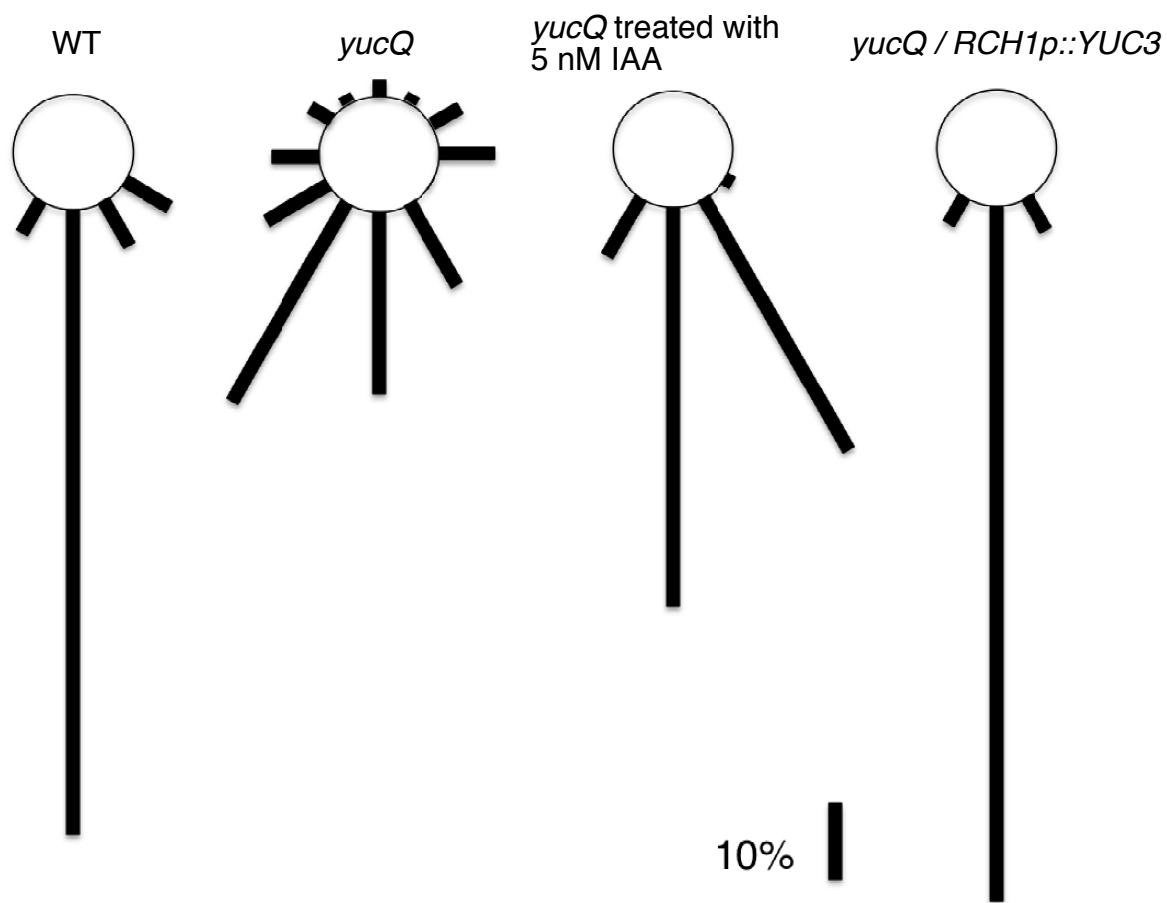

**Fig. S1. The roles of *YUC* genes in gravitropic response.** Wild-type plants grow towards gravity, but disruption of the five *YUC* genes (*yucQ*) led to agravitropic growth. Addition of 5 nM IAA into the growth media largely rescued the gravitropic response defects of *yucQ*. Expression of *YUC3* in the roots of *yucQ* completely rescued the gravitropic response defects.
