# Supplementary material
Source: PubMed Central journal article supplement (PMC4051135)
Supplement: supp_pcu039_pcp-2013-e-00559-File007.pdf [file supp_pcu039_pcp-2013-e-00559-File007.pdf]

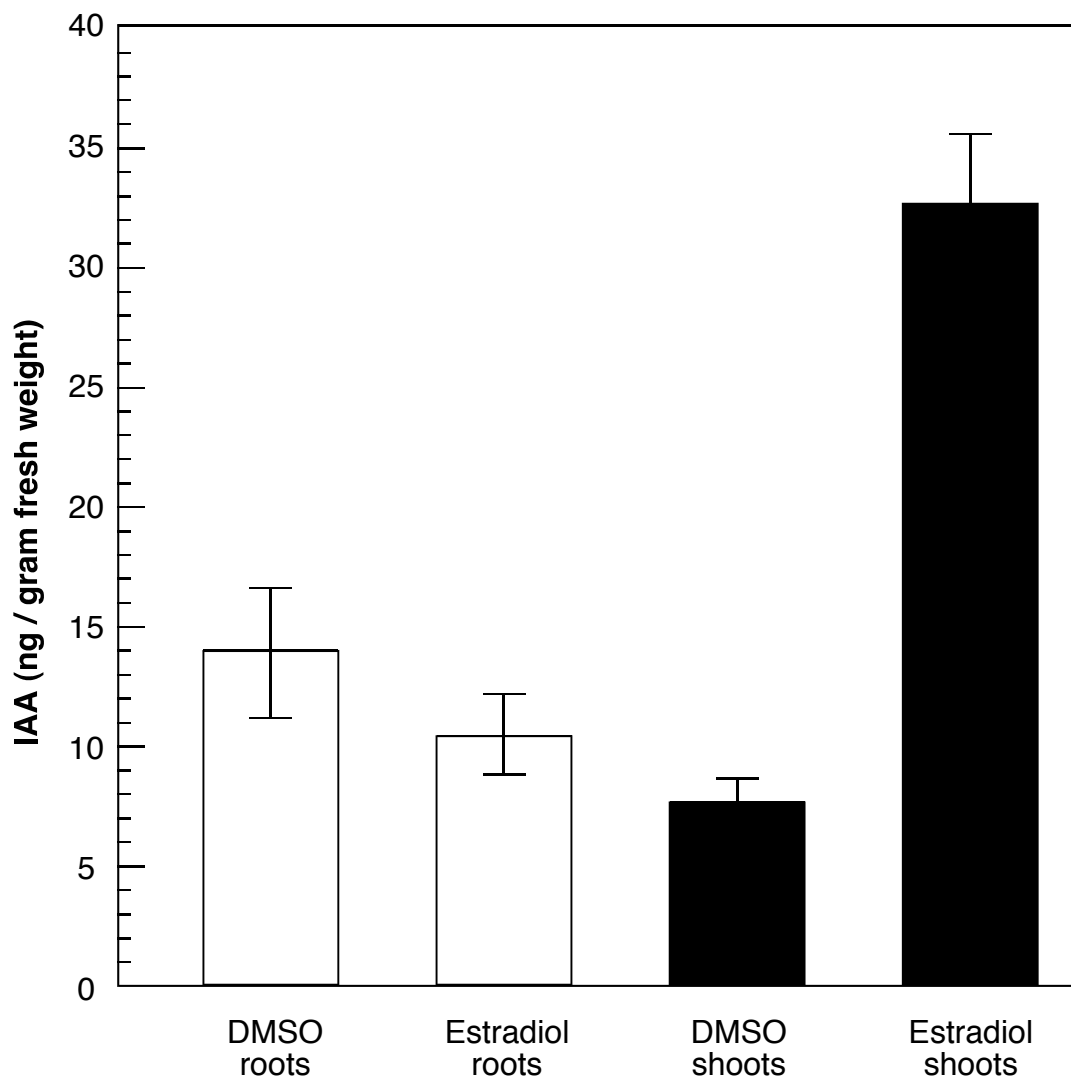

**Figure S2. The effects of auxin overproduction in shoots on auxin concentrations in roots.** The *yucQ / FRO6::XVE::YUC3* plants were grown on DMSO or 5  $\mu$ M estradiol for 7-days. The root and shoot tissues were harvested and analyzed separately.
