# Supplementary material
Source: PubMed Central journal article supplement (PMC4051135)
Supplement: supp_pcu039_pcp-2013-e-00559-File008.pdf [file supp_pcu039_pcp-2013-e-00559-File008.pdf]

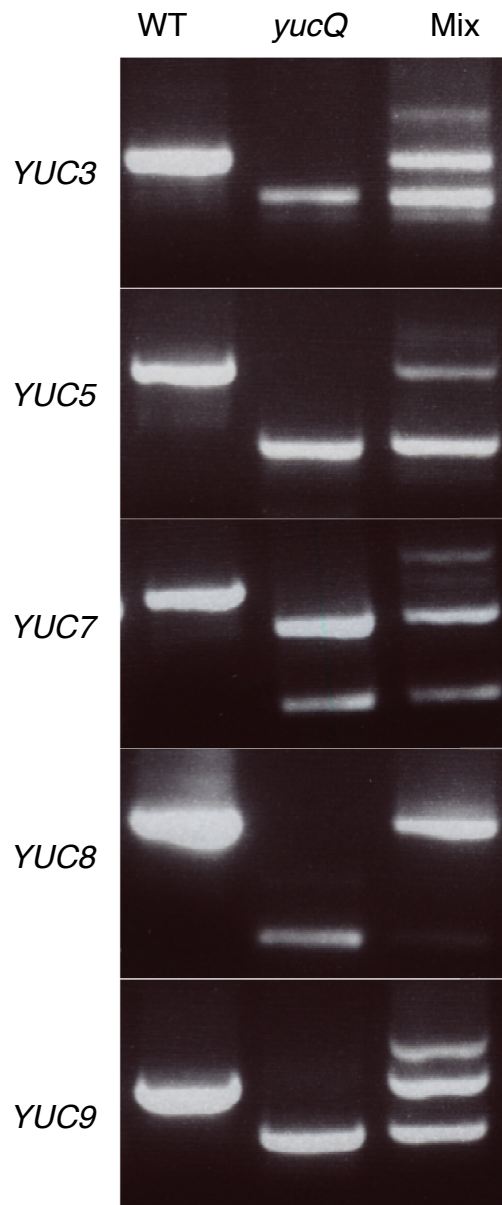

**Fig. S3. Genotyping patterns of the *yuc* mutants.** The genotyping primers were specified in the Materials and Methods section. The PCR products were separated in 1% agarose gel. Mix refers to the mixture of equal amounts of DNA of *yucQ* and WT.
